# Supplementary material for: Effects of Voluntary Wheel Running Exercise on Chemotherapy-Impaired Cognitive and Motor Performance in Mice
Source: MDPI journal article supplement (doi:10.3390/ijerph20075371), 2023-04-03
Supplement: s1 [file s1]

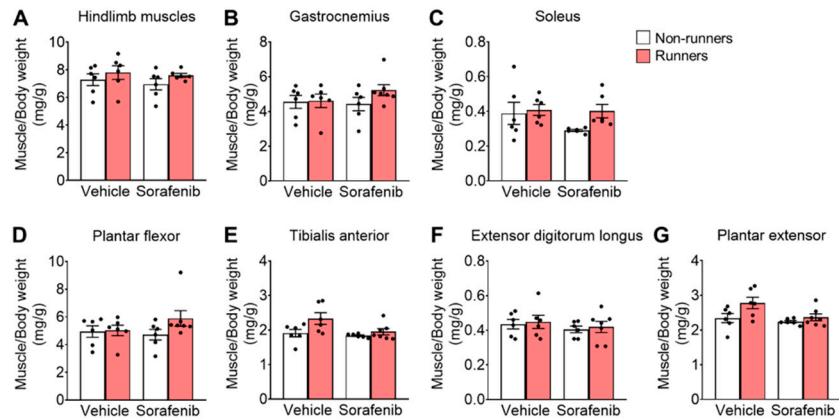

**Supplementary Figure S1: Neither voluntary running nor sorafenib administration affected skeletal muscle weight.** Neither sorafenib administration nor voluntary running exercise affected muscle weight per body weight in the (A) hindlimbs, (B) gastrocnemius, (C) soleus, (D) plantar flexor, (E) tibialis anterior, (F) extensor digitorum longus, and (G) plantar extensor. Results were expressed as mean  $\pm$  SEM.  $n = 6$  per group.

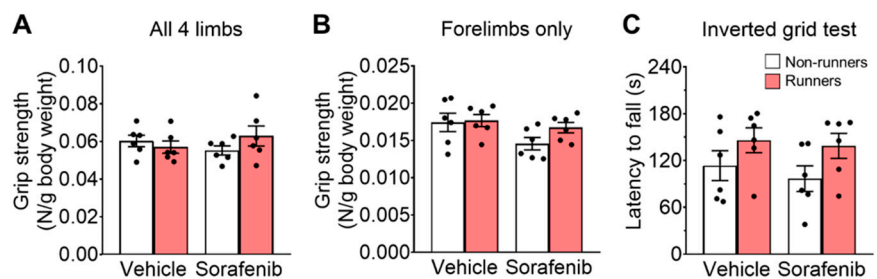

**Supplementary Figure S2: Effect of sorafenib administration and voluntary wheel running exercise on skeletal muscle strength.** Neither sorafenib administration nor voluntary running exercise affected the grip strength of (A) all four limb muscles and (B) forelimbs only in the grip strength test. (C) Also, neither treatment affected the performance in the inverted grid test. Results were expressed as mean  $\pm$  SEM.  $n = 6$  per group.
